# Supplementary material for: Characterisation of the transfer of cluster ions through an Atmospheric Pressure interface Time-of-Flight mass spectrometer with hexapole ion guides
Source: Copernicus journal article supplement (doi:10.5194/amt-2019-97), 2019-04-30
Supplement: Supplementary file [file amt-2019-97-AC1-supplement.pdf]

1 ***Interactive comment on “Characterisation of the transfer of cluster***  
2 ***ions through an Atmospheric Pressure interface Time-of-Flight mass***  
3 ***spectrometer with hexapole ion guides” by Markus Leiminger et al.***

4  
5 **Markus Leiminger et al.**

6  
7 markus.leiminger@uibk.ac.at

8  
9 Published: 22.08.2019

10

11 We thank Referee #2 for his comments that will help us to improve our manuscript. In the following, we present  
12 our reply. The reviewer’s comments (RC) are marked in *italic*, our replies (AC) follow in Times New Roman and  
13 the updated text is shown in blue.

14

15 *RC: 1. My main concern relates to the fact that no response at all is seen in the hydronium ion distribution before*  
16 *a dV of 4V. The authors seem to assume that this means that no cluster fragmentation is taking place at all. To me*  
17 *this rather seems to be a clear indication that this region of the ionAPI is not the region where cluster*  
18 *fragmentation is mainly taking place (before the dV is increased high enough). If there is considerable*  
19 *fragmentation taking place somewhere after this region, with collisions able to break clusters of, say, 25kcal/mol,*  
20 *then it is not surprising that the dV in the probed region needs to go very high before starting to have an effect on*  
21 *the cluster distribution. The authors need to be more convincing with this data in order to be able to claim that this*  
22 *instrument is much less fragmenting than similar instruments.*

23 AC: We thank referee #2 for his comment on this topic. We agree that the way the data of Fig. 7 is acquired and  
24 illustrated led to the conclusion that no fragmentation is likely to happen before a dV of 4 V. There are two issues  
25 with Fig. 7. The first one is that a voltage of -13 V is applied during the dV scan to the lens (lens-1) that follows  
26 the second hexapole (hexapole-2). This was done to maintain the transmission during the scanning procedure.  
27 Unfortunately, this might have also been a source of fragmentation that could have dominated the first few steps  
28 of the dV scan. The second issue is that in Fig. 7 all signals are normalised to the sum of all four cluster ions. This  
29 was done to account for transmission effects during the scan. Consequently, the first few voltage steps appear flat  
30 in the response of the cluster ion distribution.

31 We offer two solutions to these issues. First of all, we updated Fig. 7 by normalising the signals on each cluster  
32 ions’ initial signal to follow the methods described in Lopez-Hilfiker et al. (2016).

33 In the updated version of Fig. 7, the response in the hydronium ion distribution is slightly different. Here,  
34 transmission effects for small dVs play a clearly visible role. With increasing dV, the hydronium ion distribution  
35 still shows only little changes. To address the referee's concerns, this could indeed be explained with fragmentation  
36 happening in another region of the ioniAPi. As we found the voltage of -13 V applied to lens-1 is the most likely  
37 reason. The new  $dV_{50}$  values for the hydronium ions  $H_3O^+(H_2O)_3$  and  $H_3O^+(H_2O)_2$  show no dependence on the  
38 selected normalisation.

39 To understand such fragmentation in more detail and with reduced complexity, we further created a supplement  
40 and added a series of experiments.

41 Line 349: In the current configuration of the ioniAPi-TOF, no axial electric fields can be applied to any parts of  
42 the first pressure stage as explained previously. Therefore, the dV scan is obtained in a slightly different way  
43 compared to the one described in Lopez-Hilfiker et al. (2016). In Lopez-Hilfiker et al. (2016), the whole first  
44 pressure stage is shifted towards a more negative dV while the voltages downstream remain constant. In our case,  
45 no shift of the first pressure stage is currently possible. Therefore, the first pressure stage remains at ground  
46 potential.

47 Line 355: with a constant voltage of -13 V at the first lens that follows the second hexapole.

48 Line 382: As the voltage at the first lens is set to -13 V, fragmentation between the second hexapole and the  
49 following lens might dominate the first few voltage steps. To distinguish the role of the region from the skimmer  
50 to the entrance of the second hexapole and the region from the exit of the second hexapole to the following lens,  
51 we show additional experiments in the supplement. With a high-resolution ioniAPi-TOF, we conducted the same  
52 experiments and show with Fig. S4 that both instruments show nearly identical responses of the hydronium ion  
53 distribution to the dV scan procedure used in Fig. 7. In Fig. S5, a declustering scan between skimmer-1 and the  
54 second hexapole shows  $dV_{50}$  values shifted to lower values, see Table 4 if the second hexapole and the following  
55 lens are stepped synchronously. In Fig. S6, a declustering scan between the exit of the second hexapole and the  
56 following first lens with lens 1 and lens 2 being stepped synchronously reveals that a voltage of below -9 V mainly  
57 increases the ion transmission. Only above -9 V the voltage difference from lens 1 to the exit of the second hexapole  
58 is high enough to induce fragmentation of the weaker bound hydronium cluster ions. Fig. S7 shows that a voltage  
59 scan between lens-1 and lens-2 has no effect on the hydronium cluster ion distribution. As a consequence, the region  
60 between skimmer-1 and the second hexapole is the region where voltage settings can be most effective on the  
61 fragmentation of cluster ions compared to the other probed regions.

62 Line 412: Below these dVs, fragmentation is not a significant issue between the skimmer-1 and the second  
63 hexapole.

64 Line 414: through the probed regions of the ioniAPi without substantial fragmentation for a low fragmenting  
65 setting.

66 Line 416: Assuming a linear relationship between the voltage difference and the binding energy according to  
67 Lopez-Hilfiker et al. (2016), we extrapolate a threshold binding energy of 8 to 11 kcal/mol using the  $dV_{50}$  values  
68 from Table 4 for the ion transfer between skimmer-1 and the second hexapole. Other regions were shown to be less  
69 critical.

70 Line 420: It has to be noted that the ion transmission shows strong responses for even small voltage differences  
71 between ion optic parts. A DC offset of only 0.2 V on the second hexapole for example can significantly improve  
72 the ion transmission compared to no offset. To maintain a satisfying detection sensitivity the electric potentials of  
73 the second hexapole and the following lens should be set closely.

74 Line 443: Nevertheless, our data suggests that the critical region of the ioniAPi is between the skimmer and the  
75 entrance of the second hexapole and that it allows a slightly lower threshold binding energy for the transfer of  
76 cluster ions.

77 Line 513: Using the system of  $H_3O^+(H_2O)_n$  we were able to estimate that cluster ions with binding energies above  
78 17 kcal/mol are not substantially fragmenting in the critical region between the skimmer and the second hexapole.  
79

80 *RC: 2. As clusters are fragmenting, they will cause an increase in smaller water clusters. This is e.g. seen in the*  
81 *increase of the monomer and dimer clusters. There is no discussion about the potential influence of this on the*  
82 *trimer and tetramer when determining the  $dV_{50}$ .*

83 AC: We agree with referee #2. We added the following lines.

84 Line 374:  $H_3O^+(H_2O)_2$  shows no significant response to the decrease of the  $H_3O^+(H_2O)_3$  ion. This can be attributed  
85 to an overall low count rate of  $H_3O^+(H_2O)_3$  and a much higher count rate of  $H_3O^+(H_2O)_2$ . Fragmentation of  
86  $H_3O^+(H_2O)_3$  will therefore not significantly increase the  $H_3O^+(H_2O)_2$  count rate.  
87

88 *RC: 3. In Lopez-Hilfiker et al (2016),  $dV_{50}$  was defined as the voltage where the initial signal decreased to 50%.*  
89 *Here the voltage seems to be determined by the decrease halfway to the arbitrary maximum of the voltage scan.*

90 AC: In Lopez-Hilfiker et al. (2016), the  $dV_{50}$  was described as the voltage at half signal maximum. In most cases  
91 but not in all, the maximum agreed with the initial signal in that study. We updated Fig. 7 and normalised the  
92 signals of each cluster to its initial signal in agreement with Lopez-Hilfiker et al. (2016).

93 Line 360: The count rates of each ion are normalised to its initial count rate during the scan.

94 RC: 4. The expansion from atmospheric pressure into the APi will cause significant cooling, and most likely  
95 formation of larger water clusters. This should be acknowledged and considered potential impacts on the results.

96 AC: We agree that this process is important to discuss. We added the following paragraph.

97 Line 398: A potential source of uncertainty on the experiments with hydronium cluster ions may be the  
98 fragmentation of larger hydrated hydronium clusters  $\text{H}_3\text{O}^+(\text{H}_2\text{O})_n$  with  $n>3$ . Such clusters could potentially form  
99 on collisions with available water molecules during the expansion from ambient pressure into the first pressure  
100 stage due to the significant cooling. During this experiment, no larger water clusters were detected likely due to the  
101 use of clean and dried air having a low relative humidity (RH) of approximately 2 %. Other experiments at higher  
102 RH showed hydronium clusters up to 1000 m/z and higher. The impact of larger hydronium ions on the dV scan  
103 can be discarded in this study.

104 The high number of collisions in the first pressure stage leads to a thermodynamic equilibrium distribution of  
105 hydronium clusters. Consequently, a dV scan in the second pressure stage affects only the established hydronium  
106 cluster distribution coming from the first pressure stage.

107

108 RC: Line 16: "As we will show" is not commonly used in an abstract summarizing the work.

109 AC: We thank Referee #2 for pointing this out.

110 In our case, hexapoles can accept and transmit a broad mass range enabling the study of small precursor ions and  
111 heavy cluster ions at the same time.

112

113 RC: Line 32: "Owing" would read better as "having".

114 AC: We thank Referee #2 for this suggestion.

115 Typically, up to ten thousand ions per  $\text{cm}^3$  can be observed within the troposphere having a lifetime of a few  
116 hundred seconds.

117

118 RC: Line 74: Please clarify what "interactions with the reagent ion" means here.

119 AC: We rephrased line 74 accordingly.

120 It remains unclear, if this threshold can be explained by fragmentation in the APi or by the loss of weakly bound  
121 ligands during the charging process of a neutral cluster by the reagent ion in the Ion-Molecule-Region (IMR) of  
122 the ToF-CIMS (Kurten et al., 2014).

123

124 RC: Line 74: It is not customary to refer to the instrument being described here as a CI-APi-TOF. That term is  
125 typically used only for the atmospheric pressure “Eisele-type” CI inlet, while the one used here is generally called  
126 a ToF-CIMS.

127 AC: We correct the instruments’ abbreviation in Lines 75, 76, 426, 427, 436, 438 to:

128 CI-APi-TOF -> ToF-CIMS

129

130 RC: Lines 87-100: The entire discussion around Eq. 1 is quite hard to follow, in part due to the complexity of  
131 multipole physics in general. I suggest the authors describe a bit more concretely what the function of  $V^*$  is, and  
132 how it will affect the ions. Also, clarify the argumentation why the  $(r/r_0)^4$  dependence causes a “larger field free  
133 region”, as the simple interpretation of the equation is that the 4th power dependence of a hexapole would lead to  
134 a higher impact on the radial energy compared to the 2<sup>nd</sup> power dependence of a quadrupole.

135 AC: We improved the discussion around the effective potential as shown below:

136 Line 88: From theory, there are some differences with regard to the ion transfer properties comparing the  
137 quadrupole to higher order multipoles that can mainly be explained by the number of rods. To radially trap or guide  
138 ions of various mass-to-charge ( $m/z$ ) ratios through a multipole a radiofrequency (RF) with amplitude  $V_0$  is applied  
139 on alternating rods. Ions of low  $m/z$  are efficiently trapped with higher frequencies and lower amplitudes while  
140 ions of high  $m/z$  can be more efficiently transferred with lower frequencies and higher amplitudes. The time-  
141 averaged radial trapping field within a multipole of  $2n$  electrodes can be described with the effective potential  $V^*$   
142 (Gerlich, 1992):

143 
$$V^* = \frac{n^2}{4} \frac{q^2}{m \Omega^2} \frac{V_0^2}{r_0^2} \left( \frac{r}{r_0} \right)^{2n-2} \quad (1)$$

144 Here, we have the charge  $q$ , the ion mass  $m$ , the angular frequency  $\Omega$ , the amplitude  $V_0$ , the inner radius of the  
145 electrode arrangement  $r_0$  and the radial distance of the ion  $r$  inside the multipole. In general, the effective potential  
146  $V^*$  is high close to the rods and low close to the centre. The slope between multipole rods and its centre depends  
147 on the rod number, see Fig. S0. A higher rod number further provides a more homogenous trapping field. The  
148 trapping fields of RF-only multipoles do not affect the axial kinetic energy of ions, but can affect the radial ion  
149 energy (Armentrout, 2000).

150 From Equ. 1, it can be seen that the effective potential varies with  $(r/r_0)^{2n-2}$ . A quadrupole ( $n=2$ ) has a quadratic  
151 dependence  $(r/r_0)^2$  while a hexapole depends on  $(r/r_0)^4$ . Consequently, the effective potential of a quadrupole  
152 increases much closer to the centre of the ion guide compared to a hexapole. On the one hand, this results in an  
153 efficient focusing of the ions for a quadrupole, but on the other hand, this yields strong perturbations of ions in

154 radial direction and thus, the ion kinetic energies are not well defined. Here, a hexapole has a much lower impact  
155 on the radial energy due to a larger field free region, as the effective potential is flatter close to the centre and higher  
156 close to the rods. Compared to higher order multipoles that have an even larger field free region, a hexapole still  
157 offers a more pronounced focusing power.

158 The  $n^2$ -dependence of the effective potential further means that for the same RF settings, a hexapole has a stronger  
159 trapping field over a quadrupole of a factor of 9/4. To transfer ions of high  $m/z$  with the same efficiency, a  
160 quadrupole would require higher RF settings which in turn would lead to an increased effective potential not only  
161 close to the rods but also in the centre according to the  $(r/r_0)^2$  dependence of the effective potential.

162

163 *RC: Figure 3 is referenced before figure 2.*

164 *AC: We thank Referee #2 for highlighting this. We changed the order of figure 3 and figure 2 in lines 184 and 169.*

165

166 *RC: Lines 243-244: This HTOF lacking an APi needs some clarification, as sampling without any atmospheric*  
167 *pressure interface should not be possible here.*

168 *AC: We agree this requires more information. We added the following lines.*

169 *Lines 268: ... with an H-TOF, Tofwerk AG Thun Switzerland, without an APi interface in the laboratory at the*  
170 *University of Innsbruck (UIBK). This H-TOF was not equipped with a typical APi as it is part of a PTR-SRI-TOF*  
171 *MS (Graus et al., 2010). For the experiments with the UDMA, we mounted a simple single pressure stage. This*  
172 *single pressure stage consisted of a front plate with a critical orifice diameter of 0.3 mm and two electrode lenses*  
173 *that were connected to the sampler plate of the H-TOF. A pressure of 2 mbar in the single pressure stage was*  
174 *achieved with a pre-pressure pump..*

175

176 *Additional references*

177

178 *Graus, M., Müller, M., and Hansel, A. (2010). High resolution PTR-TOF: quantification and formula confirmation*  
179 *of VOC in real time. J. Am. Soc. Mass Spectrom. 21, 1037–1044. doi: 10.1016/j.jasms.2010.02.006*

180

181 *Kurtén, T., Petäjä, T., Smith, J., Ortega, I. K., Sipilä, M., Junninen, H., Ehn, M., Vehkamäki, H., Mauldin, L.,*  
182 *Worsnop, D. R., and Kulmala, M.: The effect of H<sub>2</sub>SO<sub>4</sub> – amine clustering on chemical ionization mass*  
183 *spectrometry (CIMS) measurements of gas-phase sulfuric acid, Atmos. Chem. Phys., 11, 3007-3019,*  
184 *<https://doi.org/10.5194/acp-11-3007-2011>, 2011.*
